# Supplementary material for: Targeted isolation and analysis of single tumor cells with aptamer-encoded microwell array on microfluidic device
Source: Royal Society of Chemistry journal article supplement (doi:10.1039/c2lc40858a), 2012-01-01
Supplement: c2lc40858a.pdf [file c2lc40858a.pdf]

## Electronic Supplementary Information

### **Targeted Isolation and Analysis of Single Tumor Cells with Aptamer-Encoded Microwell Array on Microfluidic Device**

Qiushui Chen, Jing Wu, Yandong Zhang, Zhen Lin, Jin-Ming Lin\*

*Beijing Key Laboratory of Microanalytical Method and Instrumentation, Department of  
Chemistry, Tsinghua University, Beijing 100084, P.R. China*

---

\* To whom correspondence should be addressed. E-mail: [jmlin@mail.tsinghua.edu.cn](mailto:jmlin@mail.tsinghua.edu.cn). Fax/Tel: +86 10 62792343

## 1. Fabrication of PDMS chip

This device consists of two components: PDMS layer with two microchannels and glass substrate with microwell array. The PDMS chip was fabricated by using traditional standard soft lithography techniques.<sup>1</sup> In brief, a silicon wafer was pre-cleaned by  $\text{H}_2\text{SO}_4$  : 30%  $\text{H}_2\text{O}_2$  (3:1, v/v) and then coated with the negative photoresists SU-8 2050 (2000 rpm, 60  $\mu\text{m}$  thick film). This silicon wafer was prebaked at 85 °C for 10 min, and then exposed by UV light under the photomask. Further, the patterned microstructure can be generated by developing solution. After hard-baked for 10 min, the master was silanized over night by tridecafluoro-1,1,2,2-tetrahydrooctyl trichlorosilane vapor. PDMS prepolymer and curing agent (10:1) was premixed and poured onto the master. After degassed in a vacuum chamber, the PDMS replicas were cured in an 85 °C oven for 3 h. Finally, the PDMS was peeled from the master and connection holes were made by using a needle. The microfluidic chamber is 60  $\mu\text{m}$  depth, 2.3 mm width and 10 mm length. The volume is about 1.38  $\mu\text{L}$ . The PDMS layer was cleaned with  $\text{CH}_3\text{OH}$  and  $\text{H}_2\text{O}$  for further application.

## 2. Operation of single-cell capture platform

Before experiments, the glass substrate was treated by piranha solution to keep its interface hydrophilic. Specially, the device was fabricated by non-covalent bonding between PDMS layer and glass substrate. As shown in [Fig. S1](#), the two components were immobilized by using two clamps. Then, PBS buffer was used to rinse and wash the microchannels. Further, 5.0  $\mu\text{L}$  of 1.0 mg/ml avidin was incubated into the microchannels for 5.0 min and washed with 5.0  $\mu\text{L}$  PBS buffer 3 times. Finally, 4.5  $\mu\text{L}$  of 100  $\mu\text{M}$  biotin-aptamer in

tris-EDTA (TE) buffer was incubated with microwells for 5.0 min and rinsed with 5.0  $\mu\text{L}$  PBS buffer 3 times. For single-cell capture experiments, a cell suspension of  $5 \times 10^7$  cells/ml was injected into microwells. After 1.0 min, the residue cells were gently washed away by 5.0  $\mu\text{L}$  PBS buffer. Finally, the microfluidic device was put on the object stage of fluorescence microscope for acquiring the images.

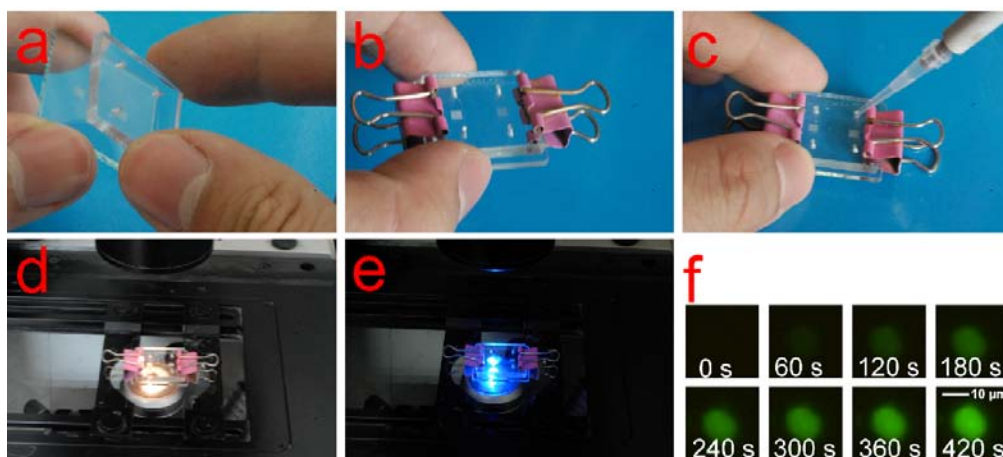

**Figure S1.** Operating procedures of microfluidic single cells isolation by using aptamer-encoded microwells. a, b) The PDMS layer and microwell array was aligned, and then non-covalent bonding was conducted by using two clamps. c) Injections of PBS buffer, avidin, biontin-aptamer and cells was performed by using a liquid-transferring gun. d, e, f) The microfluidic system was placed on microscope, and the images were acquired.

### 3. Characterization of aptamer immobilization on microwells by AFM

The immobilization of aptamer on glass substrate was conducted by previous methods.<sup>2</sup> The glass substrate with microwell array, as well as that coated with avidin and biotin-aptamer was rinsed in deionized water for 3 times. Then, these three pieces of glass were dried in a cleaned dish at room temperature. The AFM images were conducted by a tapping mode atomic force microscopy (Fig. S2).

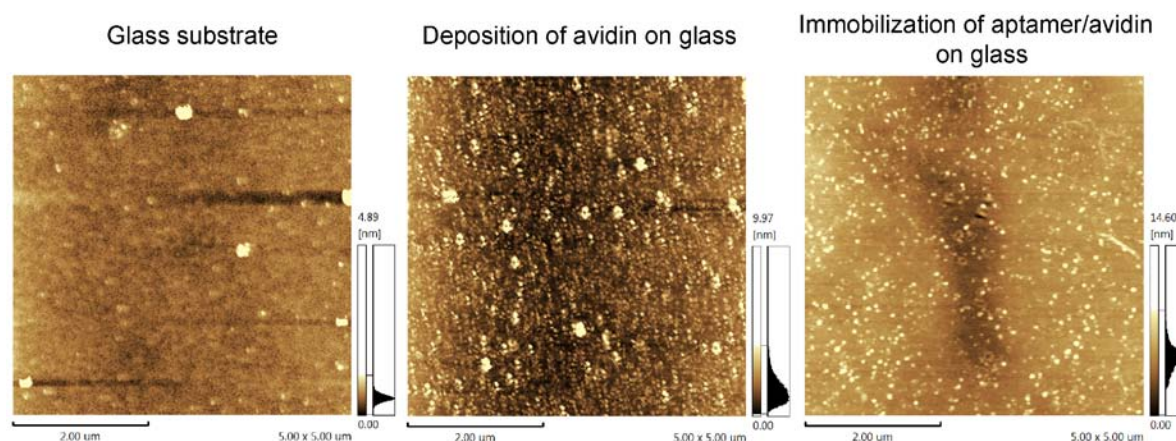

**Figure S2.** AFM images of glass substrate, deposition of avidin on glass and immobilization of biotin-aptamer.

#### 4. Enzyme dynamic analysis by using Calcein AM as a substrate

The cellular hydrolysis of aster is very important in drug-related reaction, thus will be responsible for multidrug resistance of cancer cells.<sup>3</sup> In this work, calcein AM was used as a substrate to study the cellular carboxylesterase activity at single-cell level. The reaction process was shown in [scheme 1](#).

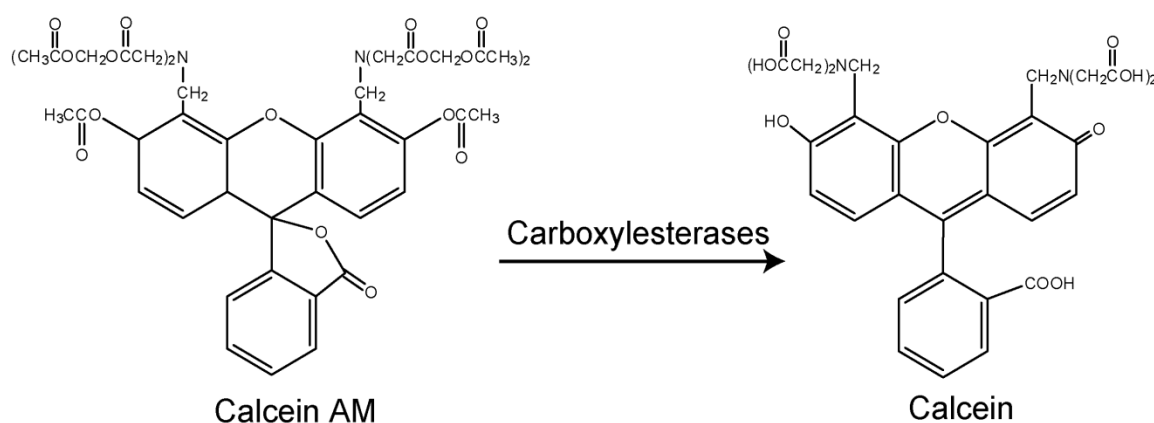

Scheme 1. The cellular carboxylesterases reaction between calcein AM and calcein.

#### 4. Single-cell occupancy under different concentrations

The single-cell occupancy experiments with different cell concentrations are performed at  $5 \times 10^4$ ,  $5 \times 10^5$ ,  $5 \times 10^6$  and  $5 \times 10^7$  cells/mL, respectively. As shown in figure S3, the results show that the single-cell occupancy is increased by the increased concentration of injected cells. In our experiments, we used a high cell concentrations of  $5 \times 10^7$  per ml for high single cell occupancy.

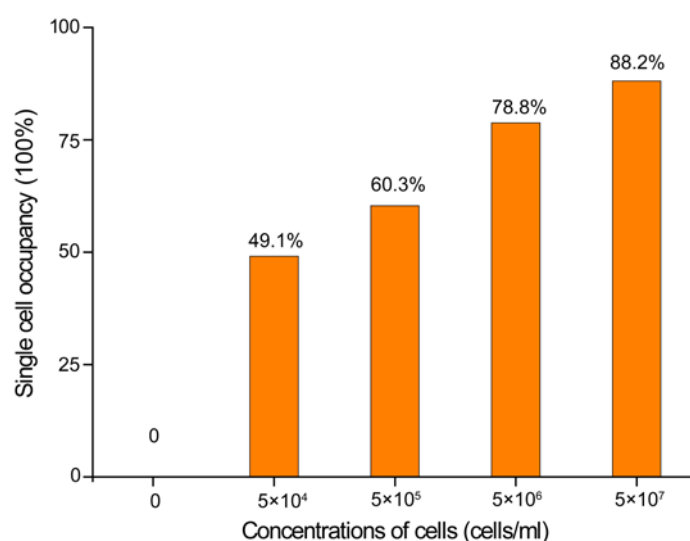

**Figure S3.** Single-cell occupancy in different concentrations at  $5 \times 10^4$ ,  $5 \times 10^5$ ,  $5 \times 10^6$  and  $5 \times 10^7$  cells/mL, respectively. Avidin: 1.0 mg/ml, Biotin-aptamer: 100  $\mu$ M.

## REFERENCES

- (1) Chen, Q.; Wu, J.; Zhang, Y.; Lin, J.-M. *Anal. Chem.* **2012**, *84*, 1695-1701.
- (2) Phillips, J. A.; Xu, Y.; Xia, Z.; Fan, Z. H.; Tan, W. *Anal. Chem.* **2009**, *81*, 1033-1039.
- (3) Essodaigui, M.; Broxterman, H. J.; Garnier-Suillerot, A. *Biochemistry* **1998**, *37*, 2243-2250.
